# Supplementary material
Source: MDPI journal article supplement (https://www.mdpi.com/2079-4991/12/21/3881)
Supplement: s1 [file s1]

Archive with 1 entries (1 files):
- nanomaterials-1961075-supplementary.pdf
